# Supplementary material for: Fungal community composition predicts forest carbon storage at a continental scale
Source: PubMed Central journal article supplement (PMC10944544; doi:10.1038/s41467-024-46792-w), 2024-03-16
Supplement: 41467_2024_46792_MOESM1_ESM.pdf [file 41467_2024_46792_MOESM1_ESM.pdf]

# Supplementary Information

## Fungal community composition predicts forest carbon storage at a continental scale

Mark A. Anthony<sup>1,2,3,\*</sup>, Leho Tedersoo<sup>4</sup>, Bruno De Vos<sup>5</sup>, Luc Croisé<sup>6</sup>, Henning Meesenburg<sup>7</sup>, Markus Wagner<sup>7</sup>, Henning Andreae<sup>8</sup>, Frank Jacob<sup>8</sup>, Paweł Lech<sup>9</sup>, Anna Kowalska<sup>9</sup>, Martin Greve<sup>10</sup>, Genoveva Popova<sup>11</sup>, Beat Frey<sup>2</sup>, Arthur Gessler<sup>1,2</sup>, Marcus Schaub<sup>2</sup>, Marco Ferretti<sup>2</sup>, Peter Waldner<sup>2</sup>, Vicent Calatayud<sup>12</sup>, Roberto Canullo<sup>13</sup>, Giancarlo Papitto<sup>14</sup>, Aleksander Marinšek<sup>15</sup>, Morten Ingerslev<sup>16</sup>, Lars Vesterdal<sup>16</sup>, Pasi Rautio<sup>17</sup>, Helge Meissner<sup>18</sup>, Volkmar Timmermann<sup>19</sup>, Mike Dettwiler<sup>1</sup>, Nadine Eickenscheidt<sup>20</sup>, Andreas Schmitz<sup>20, 21</sup>, Nina van Tiel<sup>1,22</sup>, Thomas W. Crowther<sup>1</sup>, Colin Averill<sup>1</sup>

<sup>1</sup>Department of Environmental Systems Science, ETH Zürich, Zürich, Switzerland

<sup>2</sup>Swiss Federal Institute for Forests, Snow, and the Landscape Research (WSL), Birmensdorf, Switzerland

<sup>3</sup>Center for Microbiology and Environmental Systems Science, University of Vienna, Vienna, Austria.

<sup>4</sup>Mycology and Microbiology Center, University of Tartu, Tartu, Estonia

<sup>5</sup>Environment & Climate Unit, Research Institute for Nature and Forest, Geraardsbergen, Belgium

<sup>6</sup>French National Forest Office, Fontainebleau, France

<sup>7</sup>Northwest German Forest Research Institute, Göttingen, Germany

<sup>8</sup>Sachsenforst State Forest, Pirna OT Graupa, Germany

<sup>9</sup>Forest Research Institute, Sękocin Stary, Poland

<sup>10</sup>Research Institute for Forest Ecology and Forestry, Trippstadt, Germany

<sup>11</sup>Executive Environmental Agency at the Ministry of Environment and Water, Sofia, Bulgaria

<sup>12</sup>Mediterranean Center for Environmental Studies, Paterna, Spain

<sup>13</sup>Department of Plant Diversity and Ecosystem Management, University of Camerino, Camerino, Italy

<sup>14</sup>Arma dei Carabinieri Forestry Environmental and Agri-food protection Units, Rome, Italy

<sup>15</sup>Slovenian Forestry Institute, Ljubljana, Slovenia

<sup>16</sup>Department of Geosciences and Natural Resource Management, University of Copenhagen, Frederiksberg C, Denmark

<sup>17</sup>Natural Resources Institute Finland, Rovaniemi, Finland

<sup>18</sup>Division of Forest and Forest Resources, Norwegian Institute of Bioeconomy Research, Ås, Norway

<sup>19</sup>Division of Biotechnology and Plant Health, Norwegian Institute of Bioeconomy Research, Ås, Norway

<sup>20</sup>State Agency for Nature, Environment and Consumer Protection of North Rhine-Westphalia, Recklinghausen, Germany

<sup>21</sup>Thuenen Institut of Forest Ecosystems, 16225 Eberswalde, Germany

<sup>22</sup>Environmental Computational Science and Earth Observation Laboratory, EPFL, Lausanne, Switzerland

\*Correspondence should be addressed to Mark A. Anthony ([manthony5955@gmail.com](mailto:manthony5955@gmail.com))

55 **Supplementary Table 1.** Statistical summaries comparing models of tree growth with fungal  
56 versus bacterial species richness (# of operational taxonomic units; OTUs) as predictor  
57 variables. Data shows the results of generalized additive modeling, including model  
58 estimates (i.e., coefficients), standard errors (SE), and *P*-values from full statistical models  
59 including all co-variables. Note that each model contains only one microbiome predictor.  
60

| <b>Parametric terms</b> | Estimate   | SE        | <i>t</i> -value | <i>P</i> -value |
|-------------------------|------------|-----------|-----------------|-----------------|
| (Intercept)             | -2.6573108 | 2.9009066 | -0.916          | 0.36387         |
| Fungal richness         | 0.5111837  | 0.2304736 | 2.218           | 0.03094         |
| N deposition            | 0.1259197  | 0.364195  | 0.346           | 0.73092         |
| Mineral Nitrogen Stock  | 0.4918893  | 0.1429244 | 3.442           | 0.00115         |
| MAT                     | 0.000856   | 0.0061821 | 0.138           | 8.90E-01        |
| MAP                     | -0.000385  | 0.0004432 | -0.869          | 3.89E-01        |
| Soil pH                 | -0.1918281 | 0.1133522 | -1.692          | 0.09656         |
| Soil clay content       | -0.0072983 | 0.0194758 | -0.375          | 0.70938         |
| Functional tree type    | -0.7137729 | 0.242046  | -2.949          | 0.00477         |
| Stand age               | 0.0073393  | 0.0042508 | 1.727           | 0.09018         |
| <b>Smooth term</b>      | Est. DF    | Ref. DF   | <i>F</i> -value | <i>P</i> -value |
| Stem density            | 1.918      | 1.993     | 18.91           | 1.59E-06        |
|                         |            |           |                 |                 |
| <b>Parametric terms</b> | Estimate   | SE        | <i>t</i> -value | <i>P</i> -value |
| (Intercept)             | -1.33E+01  | 4.14E+00  | -3.198          | 0.00256         |
| Bacterial richness      | 1.04E+00   | 5.24E-01  | 1.983           | 0.05363         |
| N deposition            | 7.89E-01   | 3.12E-01  | 2.531           | 0.01503         |
| Mineral Nitrogen Stock  | 3.79E-01   | 1.30E-01  | 2.907           | 0.0057          |
| MAT                     | -1.15E-02  | 6.62E-03  | -1.744          | 0.08807         |
| MAP                     | -4.28E-04  | 5.36E-04  | -0.798          | 0.42891         |
| Soil pH                 | 7.73E-02   | 1.13E-01  | 0.683           | 0.49821         |
| Soil clay content       | 1.02E-02   | 2.02E-02  | 0.505           | 0.6158          |
| Functional tree type    | -3.77E-01  | 2.21E-01  | -1.706          | 0.09514         |
| Stand age               | 8.78E-03   | 4.03E-03  | 2.177           | 0.03491         |
| <b>Smooth term</b>      | Est. DF    | Ref. DF   | <i>F</i> -value | <i>P</i> -value |
| Stem density            | 1.966      | 1.999     | 15.93           | 7.68E-06        |

61  
62  
63  
64  
65  
66  
67  
68  
69

70 **Supplementary Table 2.** Statistical summaries of models of tree growth with fungal  
 71 composition (PCoA1 and PCoA2) in the organic horizon. Predictors included PCoA axes for  
 72 total fungi. Data shows the results of generalized additive modeling, including model  
 73 estimates (i.e., coefficients), standard errors (SE), and *P*-values from full statistical models  
 74 including all co-variables. Note that each model contains only one microbiome predictor.

75

|                      | Estimate   | SE        | <i>t</i> -value | <i>P</i> -value |
|----------------------|------------|-----------|-----------------|-----------------|
| (Intercept)          | 1.2344238  | 2.722149  | 0.453           | 0.6521          |
| Fungal PCoA1         | -1.6202941 | 0.962764  | -1.683          | 0.0985          |
| N deposition         | -0.0033244 | 0.4283468 | -0.008          | 0.9938          |
| Organic N stock      | -0.1031805 | 0.0898635 | -1.148          | 0.2562          |
| MAT                  | 0.0064607  | 0.0083623 | 0.773           | 0.4433          |
| MAP                  | 0.000696   | 0.0004715 | 1.476           | 1.46E-01        |
| Soil pH              | -0.320192  | 0.128201  | -2.498          | 1.58E-02        |
| Soil clay content    | -0.0176682 | 0.0207586 | -0.851          | 0.3987          |
| Functional tree type | -0.8488874 | 0.2546885 | -3.333          | 0.0016          |
| Stand age            | 0.011126   | 0.0051554 | 2.158           | 0.0356          |
| Smooth term          | Est. DF    | Ref. DF   | F-value         | P-value         |
| Stem density         | 1.811      | 1.964     | 15.33           | 1.42E-05        |
|                      |            |           |                 |                 |
|                      | Estimate   | SE        | <i>t</i> -value | <i>P</i> -value |
| (Intercept)          | -0.985611  | 2.4867703 | -0.396          | 0.6935          |
| Fungal PCoA2         | -2.8524385 | 1.0723338 | -2.66           | 0.01041         |
| N deposition         | 0.4128144  | 0.3980336 | 1.037           | 0.30455         |
| Organic N stock      | -0.0119976 | 0.0921148 | -0.13           | 0.89688         |
| MAT                  | 0.0023515  | 0.0078527 | 0.299           | 0.76581         |
| MAP                  | 0.0004503  | 0.000466  | 0.966           | 3.39E-01        |
| Soil pH              | -0.3668078 | 0.1238869 | -2.961          | 4.64E-03        |
| Soil clay content    | -0.0244192 | 0.0203232 | -1.202          | 0.23508         |
| Functional tree type | -0.8019711 | 0.2451975 | -3.271          | 0.00192         |
| Stand age            | 0.0122024  | 0.0048105 | 2.537           | 0.01429         |
| Smooth term          | Est. DF    | Ref. DF   | F-value         | P-value         |
| Stem density         | 1.88       | 1.985     | 18.09           | 1.94E-06        |

76  
 77  
 78  
 79  
 80  
 81  
 82  
 83  
 84  
 85  
 86  
 87

88 **Supplementary Table 3. The relative abundance of fungal functional group**  
 89 **annotations.** *Italicized groups are those within the group above (e.g., wood saprotroph are*  
 90 *a group within the saprotrophs annotated as “wood saprotrophs” in FUNGuild).* Values  
 91 represent the mean relative abundance across all samples.  
 92

| Soil horizon | Group                         | Relative abundance (%) |
|--------------|-------------------------------|------------------------|
| Organic      | Ectomycorrhizal               | 23.8                   |
|              | <i>'Pure' ectomycorrhizal</i> | 19.3                   |
|              | Saprotroph                    | 38.5                   |
|              | <i>'Pure' saprotroph</i>      | 15.8                   |
|              | <i>Wood saprotroph</i>        | 14.2                   |
|              | Endophyte                     | 13.5                   |
|              | Plant pathogen                | 7.3                    |
|              | Ericoid mycorrhizal           | 2.6                    |
| Mineral      | Ectomycorrhizal               | 26.4                   |
|              | <i>'Pure' ectomycorrhizal</i> | 22.7                   |
|              | Saprotroph                    | 33.6                   |
|              | <i>'Pure' saprotroph</i>      | 15.5                   |
|              | <i>Wood saprotroph</i>        | 8.9                    |
|              | Endophyte                     | 11.2                   |
|              | Plant pathogen                | 3.8                    |
|              | Ericoid mycorrhizal           | 3.5                    |

93  
 94  
 95  
 96  
 97  
 98  
 99  
 100  
 101  
 102  
 103  
 104  
 105  
 106  
 107  
 108  
 109  
 110  
 111  
 112  
 113  
 114  
 115  
 116  
 117  
 118  
 119  
 120

121 **Supplementary Table 4.** Statistical summaries comparing models of tree growth with  
 122 different fungal functional group richness predictor variables. Data shows the model  
 123 estimates (coefficients), standard errors (SE), and *P*-values from full statistical models  
 124 including all co-variables. We only show the results for microbiome model output for brevity  
 125 because other co-variable effects are shown in Table S1. Note that each model contained  
 126 only one microbiome predictor. Models with 'pure' ectomycorrhizal fungal (Ectomyco.) and  
 127 saprotroph richness are those which were exclusively assigned to one versus multiple  
 128 functional guilds (e.g., saprotroph-pathogen). Note that pure category models were not made  
 129 for endophytes nor pathogens because it is expected that these groups will have more than  
 130 one trophic mode.

131

|                            | Estimate   | SE        | <i>P</i> -value |
|----------------------------|------------|-----------|-----------------|
| Ectomyco. richness         | 0.04590836 | 0.1492676 | 0.7596          |
| Endophyte richness         | 0.67559496 | 0.2333078 | 0.0055          |
| Plant pathogen richness    | 0.41004186 | 0.195254  | 0.04059         |
| Wood saprotroph richness   | 0.37284712 | 0.2035421 | 0.0727          |
| Ericoid richness           | 4.68E-01   | 0.1973914 | 0.02168         |
| Saprotroph richness        | 0.50018564 | 0.2269    | 3.19E-02        |
| "Pure" ectomyco. richness  | 0.02906632 | 0.1470056 | 0.8440          |
| "Pure" saprotroph richness | 0.55919943 | 0.2279858 | 0.0176          |

132

133

134

135

136

137

138

139

140

141

142

143

144

145

146

147

148

149

150

151

152

153

154

155

156

157

158

159

160

161

162

163 **Supplementary Table 5.** Eigenvalues for principal coordinate analysis axes 1 and 2 for all  
 164 microbial groups considered in the study.  
 165

| <b>Group</b>          | <b>Axis</b> | <b>Eigenvalue</b> |
|-----------------------|-------------|-------------------|
| Bacteria              | PCoA1       | 25                |
| Bacteria              | PCoA2       | 11                |
| Fungi                 | PCoA1       | 11                |
| Fungi                 | PCoA2       | 9                 |
| Ectomycorrhizal       | PCoA1       | 9                 |
| Ectomycorrhizal       | PCoA2       | 8                 |
| Pure' ectomycorrhizal | PCoA1       | 10                |
| Pure' ectomycorrhizal | PCoA2       | 9                 |
| Saprotroph            | PCoA1       | 13                |
| Saprotroph            | PCoA2       | 11                |
| Pure' saprotroph      | PCoA1       | 21                |
| Pure' saprotroph      | PCoA2       | 9                 |
| Endophytes            | PCoA1       | 17                |
| Endophytes            | PCoA2       | 14                |
| Wood saprotroph       | PCoA1       | 20                |
| Wood saprotroph       | PCoA2       | 11                |
| Ericoid mycorrhizal   | PCoA1       | 4                 |
| Ericoid mycorrhizal   | PCoA2       | 3                 |
| Plant pathogen        | PCoA1       | 13                |
| Plant pathogen        | PCoA2       | 11                |

166  
 167  
 168  
 169  
 170  
 171  
 172  
 173  
 174  
 175  
 176  
 177  
 178  
 179  
 180  
 181  
 182  
 183  
 184  
 185  
 186  
 187  
 188  
 189  
 190  
 191  
 192

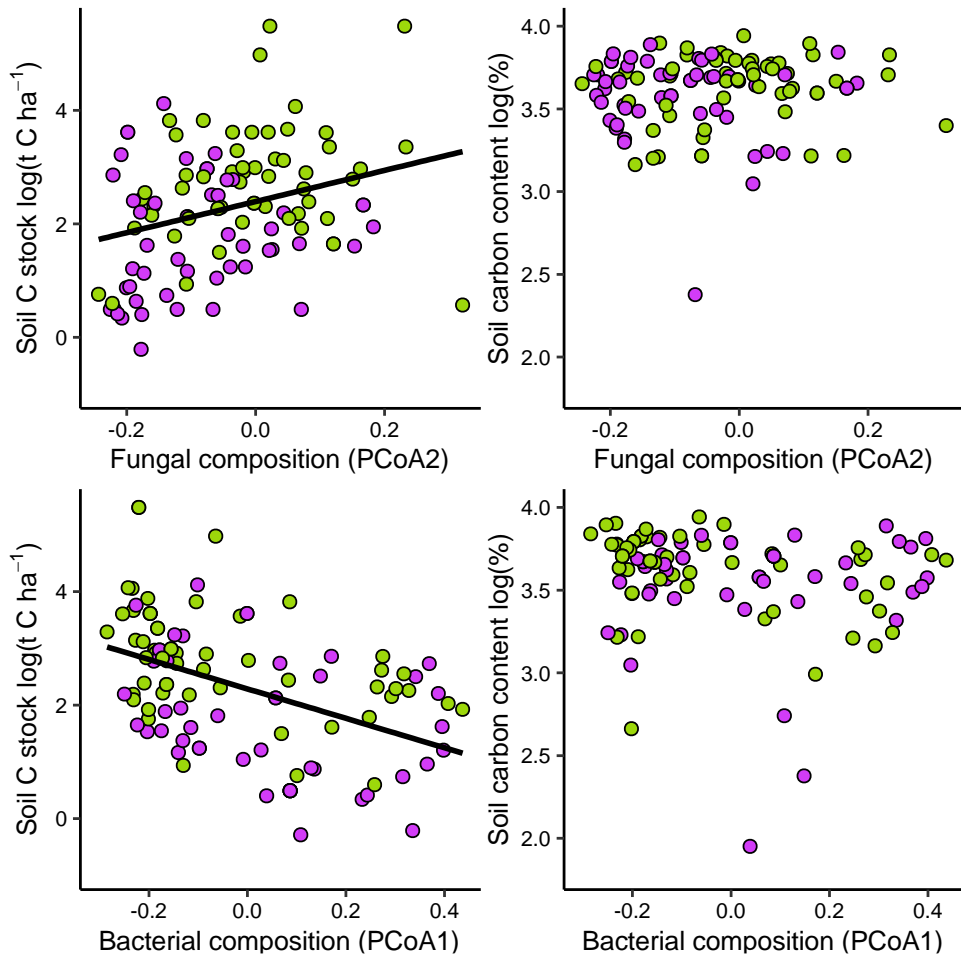

193  
 194  
 195  
 196  
 197  
 198  
 199  
 200  
 201  
 202  
 203  
 204  
 205  
 206  
 207  
 208  
 209  
 210  
 211  
 212  
 213  
 214  
 215  
 216  
 217  
 218  
 219  
 220  
 221

**Supplementary Fig. 1.** Scatterplots showing that microbiome composition is only correlated with soil carbon (C) stocks, not soil carbon content. Green and purple points show conifers and broadleaves, respectively. See Figure 4 in the main text for statistical overview of significant correlations.

222  
223

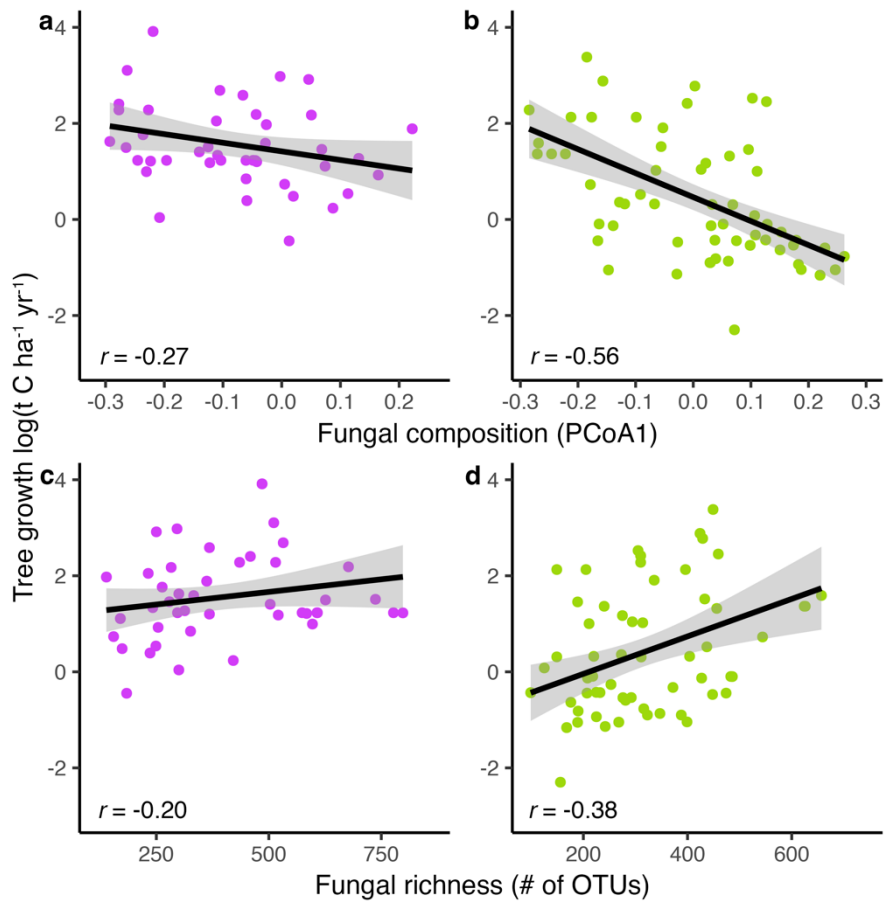

224  
225  
226  
227  
228  
229  
230  
231  
232  
233  
234  
235  
236

**Supplementary Fig. 2.** Correlations between tree growth and fungal composition and richness separated by dominant forest tree type. Green and purple points show conifers and broadleaves, respectively.



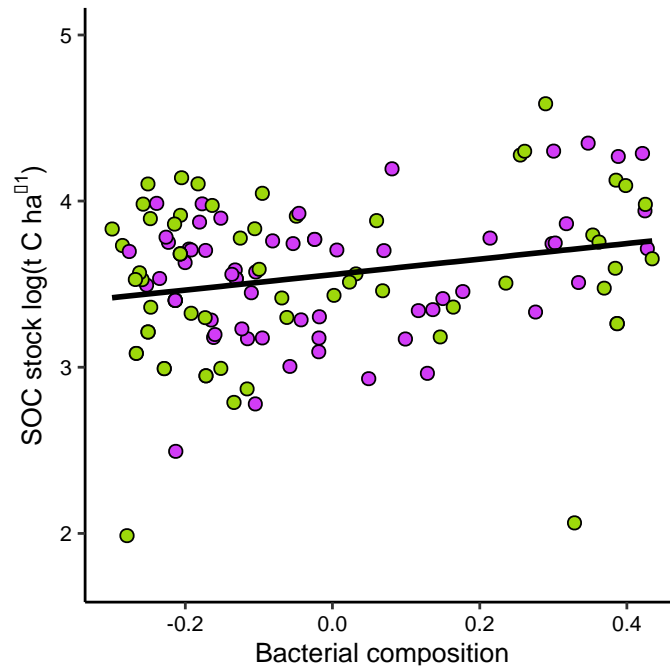

237  
238  
239  
240  
241  
242  
243  
244  
245  
246  
247  
248  
249  
250  
251  
252  
253  
254  
255  
256  
257  
258  
259  
260  
261  
262  
263  
264  
265  
266  
267  
268  
269  
270  
271  
272  
273  
274

**Supplementary Fig. 3.** The weak correlation between bacterial community composition (PCoA1) and mineral horizon SOC stocks ( $r = 0.24$ ,  $P = 0.006$ ). Only PCoA1 is shown since PCoA2 was not correlated with mineral horizon SOC stocks. Green and purple points show conifers and broadleaves, respectively.

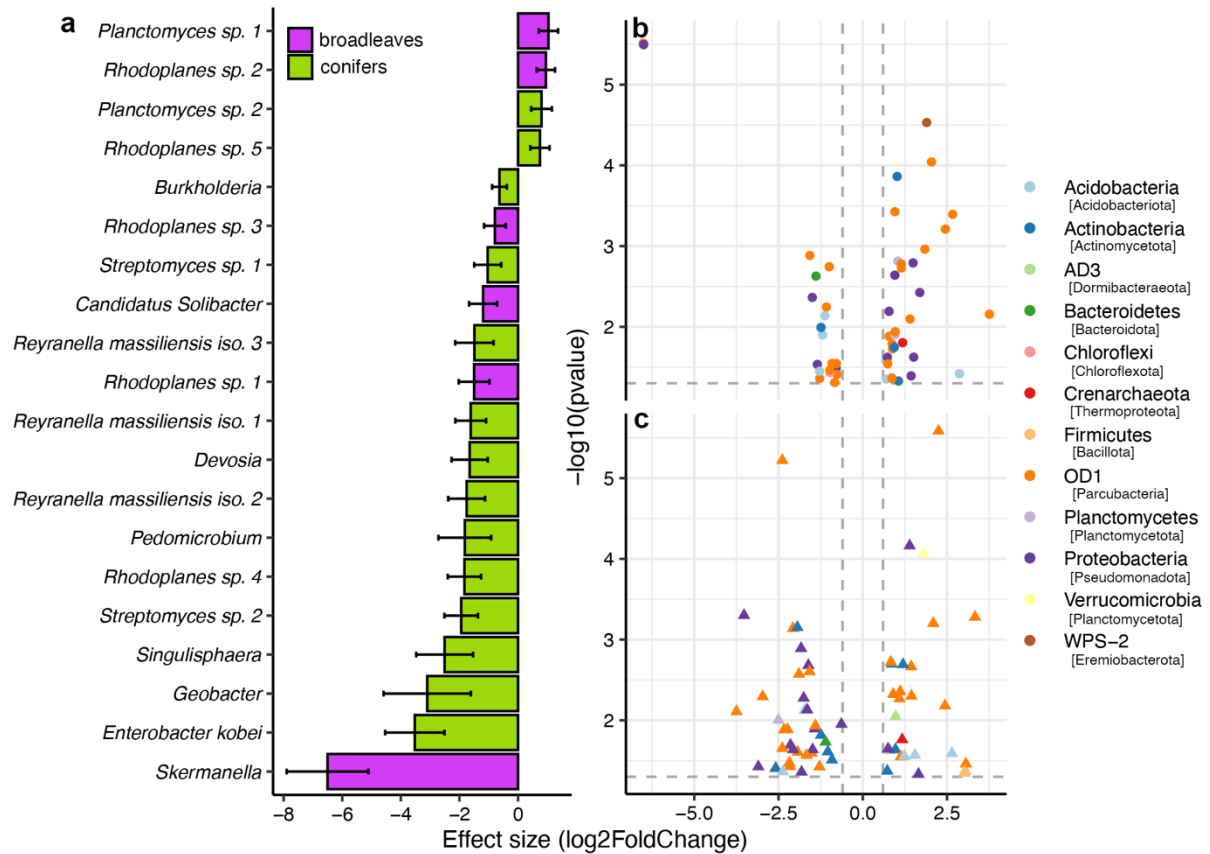

275  
276  
277  
278  
279  
280  
281  
282  
283  
284  
285  
286  
287  
288  
289  
290  
291  
292  
293  
294  
295  
296

**Supplementary Fig. 4. Bacterial taxa linked to variation in organic horizon soil organic carbon stocks.** Significant bacterial indicator species identified from DESeq2 analysis summarized from the species to phylum level. Significant indicator species of organic horizon carbon stocks that could be assigned genus and species level taxonomies using reference databases (a). Volcano plot showing the strength of all bacterial OTUs significantly correlated to soil carbon stocks in broadleaf (b) and conifer (c) forests. Values less and more than 0 indicate negative and positive correlations with organic horizon carbon stocks, respectively. Taxonomic labels in square brackets reflect the updated International Committee on Systematics of Prokaryotes (ICSP) phyla names.

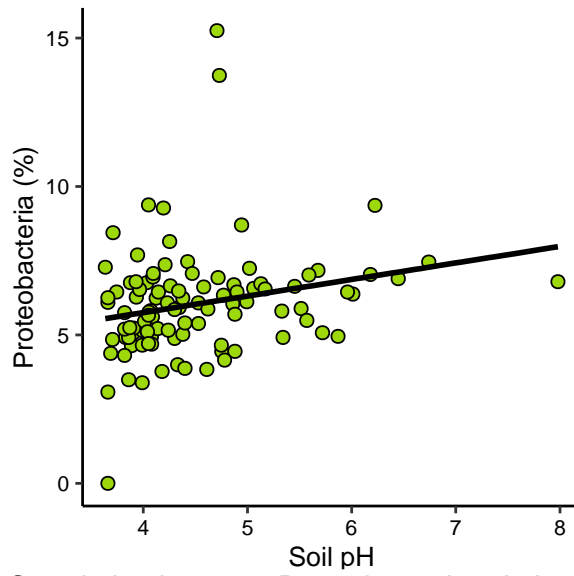

297  
298  
299  
300  
301  
302  
303  
304  
305  
306  
307  
308  
309  
310  
311  
312  
313  
314  
315  
316  
317  
318  
319  
320  
321  
322  
323  
324

**Supplementary Fig. 5.** Correlation between Proteobacteria relative abundances and soil pH in the organic horizon of coniferous forests ( $r = 0.24$ ,  $P = 0.02$ )

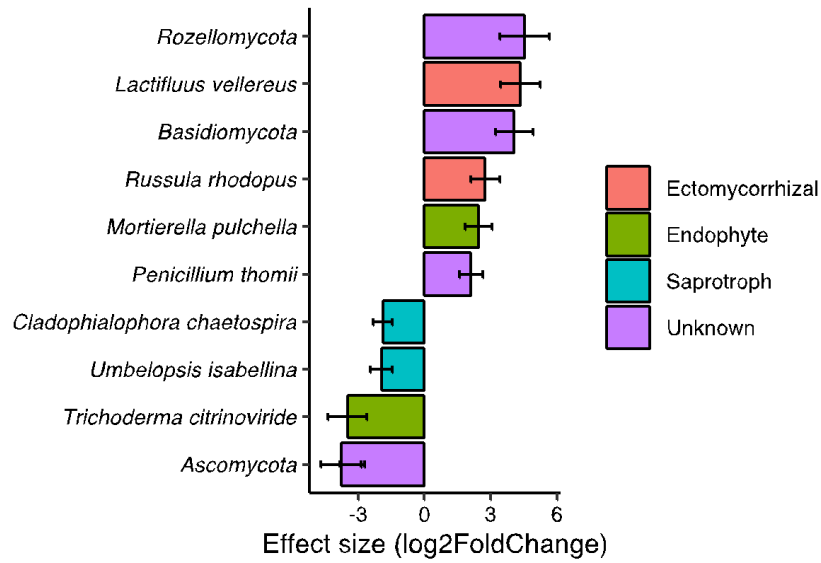

325  
 326  
 327  
 328  
 329  
 330  
 331  
 332  
 333  
 334  
 335  
 336  
 337  
 338  
 339  
 340  
 341  
 342  
 343  
 344  
 345  
 346  
 347  
 348  
 349  
 350  
 351  
 352  
 353  
 354  
 355  
 356  
 357  
 358

**Supplementary Fig. 6. Fungal taxa linked to variation in organic horizon soil organic carbon stocks.** Significant fungal indicator species were identified from DESeq2 analysis (see methods for a complete description). Taxa are labelled at the finest taxonomic resolution possible. Values less and more than 0 indicate negative and positive correlations with organic horizon carbon stocks, respectively.

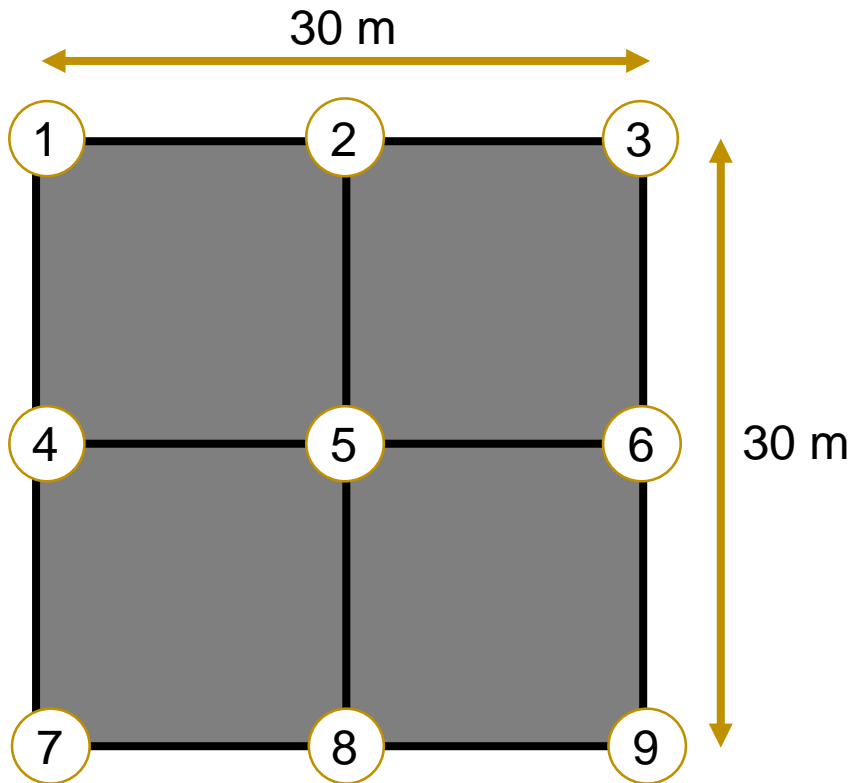

359  
360  
361  
362  
363

**Supplementary Fig. 7.** Visualization of the grid-design used for soil sampling. Soil cores were collected at positions 1-9 and pooled into one composite sample per depth increment (organic horizon and mineral soil at a 0-10 cm depth).
